# Supplementary material
Source: publisher site journal article supplement (http://www.kjim.org/upload/media/kjim-2022-050-app1.pdf)
Supplement: Supplementary file 1 [file kjim-2022-050-app1.pdf]

**Appendix 1.** The questionnaire of COVID-19 symptoms and socioeconomic problems

2021. 3. 18.

코로나 19 회복 환자 설문지

## 코로나 19 회복 환자 설문지

이 설문지는 코로나 19 확진 후 회복된 환자분들의 건강 상태를 조사하기 위해 만들어진 것입니다 (이 설문지 답변 및 모든 개인 자료는 개인 식별이 불가능하도록 처리되며, 개인 식별이 가능한 상태로는 절대 외부에 공개되지 않습니다)

1. 질문에 응답하시겠습니까?

한 개의 타원형만 표시합니다.

예  
 아니오

2. 코로나 19 진단을 언제 받으셨나요?

예: 2019년 1월 7일

### 코로나 19 급성 증상

3. 가슴이 답답하거나 아픈니까?

한 개의 타원형만 표시합니다.

예  
 아니오

4. 가슴이 답답하거나 아픈 정도는 어떠합니까?

한 개의 타원형만 표시합니다.

1      2      3      4

없거나 경미함     문제가 심각하여 진료가 필요함

2021. 3. 18.

코로나 19 회복 환자 설문지

5. 기침이 있습니까?

한 개의 타원형만 표시합니다.

- 예  
 아니오

6. 기침은 어느 정도입니까?

한 개의 타원형만 표시합니다.

|         |                       |                       |                       |                       |             |
|---------|-----------------------|-----------------------|-----------------------|-----------------------|-------------|
|         | 1                     | 2                     | 3                     | 4                     |             |
| 없거나 경미함 | <input type="radio"/> | <input type="radio"/> | <input type="radio"/> | <input type="radio"/> | 말만 해도 기침이 남 |

7. 호흡곤란이 있습니까?

한 개의 타원형만 표시합니다.

- 예  
 아니오

8. 호흡곤란이 어느 정도입니까?

한 개의 타원형만 표시합니다.

|         |                       |                       |                       |                       |              |
|---------|-----------------------|-----------------------|-----------------------|-----------------------|--------------|
|         | 1                     | 2                     | 3                     | 4                     |              |
| 없거나 경미함 | <input type="radio"/> | <input type="radio"/> | <input type="radio"/> | <input type="radio"/> | 가만히 있어도 숨이 참 |

9. 가래가 있습니까?

한 개의 타원형만 표시합니다.

- 예  
 아니오

2021. 3. 18.

코로나 19 회복 환자 설문지

10. 가래가 어느 정도입니까?

한 개의 타원형만 표시합니다.

|         |                       |                       |                       |                       |       |
|---------|-----------------------|-----------------------|-----------------------|-----------------------|-------|
|         | 1                     | 2                     | 3                     | 4                     |       |
| 없거나 경미함 | <input type="radio"/> | <input type="radio"/> | <input type="radio"/> | <input type="radio"/> | 계속 나옴 |

11. 온 몸이 쭈시고 아릅니까? (몸살)

한 개의 타원형만 표시합니다.

예

아니오

12. 몸살이 어느 정도입니까?

한 개의 타원형만 표시합니다.

|         |                       |                       |                       |                       |              |
|---------|-----------------------|-----------------------|-----------------------|-----------------------|--------------|
|         | 1                     | 2                     | 3                     | 4                     |              |
| 없거나 경미함 | <input type="radio"/> | <input type="radio"/> | <input type="radio"/> | <input type="radio"/> | 약을 먹어도 계속 아픴 |

13. 열이 있습니까?

한 개의 타원형만 표시합니다.

예

아니오

14. 열이 있다면 최근 측정된 가장 높은 체온은 얼마나 되나요?

\_\_\_\_\_

2021. 3. 18.

코로나 19 회복 환자 설문지

15. 속이 메스꺼운 증상(오심), 구토, 설사 등이 있습니까?

한 개의 타원형만 표시합니다.

- 예
- 아니오

16. 위 3가지 중 어떤 증상이며 정도는 어떻게 되나요

행당 한 개의 타원형만 표시합니다.

|    | 경미함                   | 불편함을 느끼는 정도임          | 약이 필요하거나 먹고 있음        |
|----|-----------------------|-----------------------|-----------------------|
| 오심 | <input type="radio"/> | <input type="radio"/> | <input type="radio"/> |
| 구토 | <input type="radio"/> | <input type="radio"/> | <input type="radio"/> |
| 설사 | <input type="radio"/> | <input type="radio"/> | <input type="radio"/> |

17. 냄새를 맡지 못하십니까?

한 개의 타원형만 표시합니다.

- 예
- 아니오

18. 맛이 느껴지지 않으십니까?

한 개의 타원형만 표시합니다.

- 예
- 아니오

코로나 19 관련 생활  
변화

코로나 19를 앓고 난 후, 평소에 비해 달라진 점이 있다면 말씀해 주시기 바랍니다.

2021. 3. 18.

코로나 19 회복 환자 설문지

19. 이전에는 없었는데 코로나 19 감염 후 경험하고 계신 것이 있다면 예/아니오로 답해 주세요

행당 한 개의 타원형만 표시합니다.

|              | 예                     | 아니오                   |
|--------------|-----------------------|-----------------------|
| 체중 감소        | <input type="radio"/> | <input type="radio"/> |
| 체중 증가        | <input type="radio"/> | <input type="radio"/> |
| 식욕 또는 식사량 감소 | <input type="radio"/> | <input type="radio"/> |
| 식욕 또는 식사량 증가 | <input type="radio"/> | <input type="radio"/> |
| 기운이 없음 (피로감) | <input type="radio"/> | <input type="radio"/> |
| 두통           | <input type="radio"/> | <input type="radio"/> |
| 어지러움         | <input type="radio"/> | <input type="radio"/> |
| 소화불량         | <input type="radio"/> | <input type="radio"/> |
| 변비           | <input type="radio"/> | <input type="radio"/> |
| 소변 불편감       | <input type="radio"/> | <input type="radio"/> |
| 피부 발진        | <input type="radio"/> | <input type="radio"/> |
| 피부 가려움       | <input type="radio"/> | <input type="radio"/> |
| 탈모           | <input type="radio"/> | <input type="radio"/> |
| 기억력 감퇴       | <input type="radio"/> | <input type="radio"/> |
| 관절통          | <input type="radio"/> | <input type="radio"/> |
| 불면증          | <input type="radio"/> | <input type="radio"/> |

20. 그 외에도 불편한 점이 있었다면 말씀해 주세요

---



---



---



---



---

[https://docs.google.com/forms/d/1wDzvYBcBxetQFYrSI6qSv\\_vIaxXKhCCZJlWNY2\\_VPWI/edit](https://docs.google.com/forms/d/1wDzvYBcBxetQFYrSI6qSv_vIaxXKhCCZJlWNY2_VPWI/edit)

5/7

2021. 3. 18.

코로나 19 회복 환자 설문지

21. 코로나 19 확진 후 다음 중 발생한 일이 있으신지요?

행당 한 개의 타원형만 표시합니다.

|                     | 예                     | 아니오                   |
|---------------------|-----------------------|-----------------------|
| 코로나 19로 가족을 잃었다     | <input type="radio"/> | <input type="radio"/> |
| 코로나 19로 직장을 잃었다     | <input type="radio"/> | <input type="radio"/> |
| 친구(지인) 관계가 단절되었다    | <input type="radio"/> | <input type="radio"/> |
| 코로나 19로 경제적 타격을 입었다 | <input type="radio"/> | <input type="radio"/> |
| 코로나 19로 정신적 타격을 입었다 | <input type="radio"/> | <input type="radio"/> |

22. 코로나 19로 아직도 불안하십니까?

한 개의 타원형만 표시합니다.

|            | 1                     | 2                     | 3                     | 4                     |        |
|------------|-----------------------|-----------------------|-----------------------|-----------------------|--------|
| 전혀 불안하지 않음 | <input type="radio"/> | <input type="radio"/> | <input type="radio"/> | <input type="radio"/> | 몹시 불안함 |

23. 코로나 19로 아직도 우울하십니까?

한 개의 타원형만 표시합니다.

|            | 1                     | 2                     | 3                     | 4                     |                |
|------------|-----------------------|-----------------------|-----------------------|-----------------------|----------------|
| 전혀 우울하지 않음 | <input type="radio"/> | <input type="radio"/> | <input type="radio"/> | <input type="radio"/> | 우울하고 삶의 의욕이 없음 |

24. 코로나 19로 주변 사람들이 당신을 멀리 합니까?

한 개의 타원형만 표시합니다.

|              | 1                     | 2                     | 3                     | 4                     |                |
|--------------|-----------------------|-----------------------|-----------------------|-----------------------|----------------|
| 전혀 그렇지 않습니다. | <input type="radio"/> | <input type="radio"/> | <input type="radio"/> | <input type="radio"/> | 심할 정도로 멀리 합니다. |

2021. 3. 18.

코로나 19 회복 환자 설문지

---

이 콘텐츠는 Google이 만들거나 승인하지 않았습니다.

Google 설문지

[https://docs.google.com/forms/d/1wDzvYBcBxeQFYrSI6qSv\\_vIaxXKhCCZJlWNy2\\_VPWI/edit](https://docs.google.com/forms/d/1wDzvYBcBxeQFYrSI6qSv_vIaxXKhCCZJlWNy2_VPWI/edit)

7/7
